# Supplementary material for: Identification of fungi isolated from commercial bumblebee colonies
Source: PeerJ. 2024 Jan 30;12:e16713. doi: 10.7717/peerj.16713 (PMC10836204; doi:10.7717/peerj.16713)
Supplement: Table S1 — Summary of the sample metadata associated with each sequence obtained in this study [file peerj-12-16713-s001.xlsx]

## Sheet: README
sequence data from 2013/2014 and BLAST results from 2023
Fungal identity was determined by NCBI BLASTn searches using fungi as the search organism and strictly highly similar sequences (megablast) as parameters
column	description
Colony	Bee colony the substrate was taken from
sector	Petri dish sector (1=Frass; 2= honeycup wax; 3= larvae cup wax; 4= honey)
substrate	the hive material type placed in the sector
representative sp	name of either 1) identified species or 2) if multiple sp with the same similarity, the one most likely to be associated with bees
MorphoGroup_Hive_OrganismIndex	ID of the isolates given by the student
ITS_seq	sequence results
sequence_length	the total length of the read
Forward_primer	oligo for ITS1
Reverse_primer	oligo for ITS4
Description	copy/paste from BLAST results
Max Score	copy/paste from BLAST results
Total Score	copy/paste from BLAST results
Query Cover	copy/paste from BLAST results
E value	copy/paste from BLAST results
Per. Ident	copy/paste from BLAST results
Accession	copy/paste from BLAST results
certainty_notes	a comment by MLN on the certainty of the identified spcies beyond the information in the blast results

## Sheet: Primary_data
Colony	sector	substrate	representativ_ sp	MorphoGroup_Hive_OrganismIndex	ITS_seq	sequence_length	Forward_primer	Reverse_primer	Description	Max Score	Total Score	Query Cover	E value	Per. Ident	Accession	certainty_notes
H1	1	Frass	Candida orthopsilosis	1A H1 N	GTGCTTACTGCATTTTTTTACACATGTGTTTTTCTTTTTTTTTGAAAACTTTGCTTTGGT GGGCCCATGGCCTGCCAGAGATTAAACTCAACCAAATTTTATTTAAGTCAACTGATTAAC TAATAGTCAAAACTTTCAACAACGGATCTCTTGGTTCTCGCATCGATGAAGAACGCAGCG AAATGCGATAAGTAATATGAATTGCAGATATTCGTGAATCATCGAATCTTTGAACGCACA TTGCGCCCTTTGGTATTCCAAAGGGCATGCCTGTTTGAGCGTCATTTCTCCCTCAAACCT TCGGGTTTGGTGTTGAGCGATACGCTGGGTTTGCTTGAAAGAAAGGCGGAGTATAAACTA ATGGATAGGTTTTTTTCCACTCATTGGTACAAA…	482	5′-TCC GTA GGT GAA CCT GCG G- 3′	5′-TCC TCC GCT TAT TGA TAT G-3′	Candida orthopsilosis strain HH1 internal transcribed spacer 1, partial sequence; 5.8S ribosomal RNA gene and internal transcribed spacer 2, complete sequence; and large subunit ribosomal RNA gene, partial sequence	869	869	0.99	0	1	MK156297.1	confirmed- 100 all same
H14	1	Frass	Penicillium citrinum	D1 H14 N	AGTCCTCGGGGCCCACCTCCCACCCGTGTTGCCCGAACCTATGTTGCCTCGGCGGGCCCC GCGCCCGCCGACGGCCCCCCTGAACGCTGTCTGAAGTTGCAGTCTGAGACCTATAACGAA ATTAGTTAAAACTTTCAACAACGGATCTCTTGGTTCCGGCATCGATGAAGAACGCAGCGA AATGCGATAACTAATGTGAATTGCAGAATTCAGTGAATCATCGAGTCTTTGAACGCACAT TGCGCCCTCTGGTATTCCGGAGGGCATGCCTGTCCGAGCGTCATTGCTGCCCTCAAGCCC GGCTTGTGTGTTGGGCCCCGTCCCCCCCGCCGGGGGGACGGGCCCGAAAGGCAGCGGCGG CACCGCGTCCGGTCCTCGAGCGTATGGGGCTTC…	530	5′-TCC GTA GGT GAA CCT GCG G- 3′	5′-TCC TCC GCT TAT TGA TAT G-3′	Penicillium citrinum strain DGLF6 internal transcribed spacer 1, partial sequence; 5.8S ribosomal RNA gene and internal transcribed spacer 2, complete sequence; and large subunit ribosomal RNA gene, partial sequence	950	1119	0.99	0	0.9962	KY400584.1	unconfirmed - could be Penicillium hetheringtonii, likely citrinum
H7	1	Frass	Aspergillus niger	2 N H7 A	GTGCGGGTCCTTTGGGCCCAACCTCCCATCCGTGTCTATTGTACCCTGTTGCTTCGGCGGGCCCGCCGCTTGTCGGCCGCCGGGGGGGCGCCTCTGCCCCCCGGGCCCGTGCCCGCCGGAGACCCCAACACGAACACTGTCTGAAAGCGTGCAGTCTGAGTTGATTGAATGCAATCAGTTAAAACTTTCAACAATGGATCTCTTGGTTCCGGCATCGATGAAGAACGCAGCGAAATGCGATAACTAATGTGAATTGCAGAATTCAGTGAATCATCGAGTCTTTGAACGCACATTGCGCCCCCTGGTATTCCGGGGGGCATGCCTGTCCGAGCGTCATTGCTGCCCTCAAGCCCGGCTTGTGTGTTGGGTCGCCGTCCCCCTCTCCGGGGGGACGGGCCC…	518	5′-TCC GTA GGT GAA CCT GCG G- 3′	5′-TCC TCC GCT TAT TGA TAT G-3′	Aspergillus niger isolate SAAF15 small subunit ribosomal RNA gene, partial sequence; internal transcribed spacer 1, 5.8S ribosomal RNA gene, and internal transcribed spacer 2, complete sequence; and large subunit ribosomal RNA gene, partial sequence	957	957	1	0	1	MK503966.1	unconfirmed - could be several aspergillus (including welwitchaie, foetidus)
H3	1	Frass	Zygosaccharomyces rouxii	3A F H3 A	ACTCTTACGGAGTTCTCTCAGAGTGTTGGAGGGGAAGGCCTGCGCTTAATTGCGCGGCTG TTTTTAATCTCCTCCGCCTTTGATACACACATTGGAGTTTCTACTTTTTTGTTCTCTTTG GGAGGGTTCTGCTCTCCCAGAGGTAAACACAAACAATCTTTTATTATACTATTAACACAG TCAAATGAATTTTAAAAACAAAATATTCAAAACTTTCAACAACGGATCTCTTGGTTCTCG CATCGATGAAGAACGCAGCGAACTGCGATACGTAATGTGAATTGCAGAATTCCGTGAATC ATCGAATCTTTGAACGCACATTGCGCCCCTTGGTATTCCGGGGGGCATGCCTGTTTGAGC GTCATTTCCCTCTCAAACTTTACGTTTGGTAGT…	621	5′-TCC GTA GGT GAA CCT GCG G- 3′	5′-TCC TCC GCT TAT TGA TAT G-3′	Zygosaccharomyces rouxii genes for ITS1, 5.8S rRNA, ITS2, partial and complete sequence, strain: IFO 1914	1109	1109	0.99	0	0.9951	AB302833.1	confirmed- 100 all same
H14	1	Frass	Candida parapsilosis	3B C1 H14 N	TTTGAAAACTTTGCTTTGGTAGGCCTTCTATATGGGGCCTGCCAGAGATTAAACTCAACC AAATTTTATTTAATGTCAACCGATTATTTAATAGTCAAAACTTTCAACAACGGATCTCTT GGTTCTCGCATCGATGAAGAACGCAGCGAAATGCGATAAGTAATATGAATTGCAGATATT CGTGAATCATCGAATCTTTGAACGCACATTGCGCCCTTTGGTATTCCAAAGGGCATGCCT GTTTGAGCGTCATTTCTCCCTCAAACCCTCGGGTTTGGTGTTGAGCGATACGCTGGGTTT GCTTGAAAGAAAGGCGGAGTATAAACTAATGGATAGGTTTTTTCCACTCATTGGTACAAA CTCCAAAA	374	5′-TCC GTA GGT GAA CCT GCG G- 3′	5′-TCC TCC GCT TAT TGA TAT G-3′	Candida parapsilosis isolate BABYLON4 internal transcribed spacer 1, partial sequence; 5.8S ribosomal RNA gene and internal transcribed spacer 2, complete sequence; and large subunit ribosomal RNA gene, partial sequence	680	680	1	0	1	MN384430.1	confirmed- 100 all same
H12	1	Frass	Aspergillus fumigatus	4 Z H12 A	TCTGGGTCACCTCCCACCCGTGTCTATCGTACCTTGTTGCTTCGGCGGGCCCGCCGTTTC GACGGCCGCCGGGGAGGCCTTGCGCCCCCGGGCCCGCGCCCGCCGAAGACCCCAACATGA ACGCTGTTCTGAAAGTATGCAGTCTGAGTTGATTATCGTAATCAGTTAAAACTTTCAACA ACGGATCTCTTGGTTCCGGCATCGATGAAGAACGCAGCGAAATGCGATAAGTAATGTGAA TTGCAGAATTCAGTGAATCATCGAGTCTTTGAACGCACATTGCGCCCCCTGGTATTCCGG GGGGCATGCCTGTCCGAGCGTCATTGCTGCCCTCAAGCACGGCTTGTGTGTTGGGCCCCC GTCCCCCTCTCCCGGGGGACGGGCCCGAAAGGC…	571	5′-TCC GTA GGT GAA CCT GCG G- 3′	5′-TCC TCC GCT TAT TGA TAT G-3′	Aspergillus fumigatus voucher NWUSeq24 internal transcribed spacer 1, partial sequence; 5.8S ribosomal RNA gene and internal transcribed spacer 2, complete sequence; and large subunit ribosomal RNA gene, partial sequence	1020	1020	0.98	0	1	MK841436.1	unconfirmed - almost certainly fumigatus, slightl possibility of niger
H9	2	honeycup	Aspergillus fumigatus	1A 5 H9 A	GCTCTGGGTCACCTCCCACCCGTGTCTATCGTACCTTGTTGCTTCGGCGGGCCCGCCGTT TCGACGGCCGCCGGGGAGGCCTTGCGCCCCCGGGCCCGCGCCCGCCGAAGACCCCAACAT GAACGCTGTTCTGAAAGTATGCAGTCTGAGTTGATTATCGTAATCAGTTAAAACTTTCAA CAACGGATCTCTTGGTTCCGGCATCGATGAAGAACGCAGCGAAATGCGATAAGTAATGTG AATTGCAGAATTCAGTGAATCATCGAGTCTTTGAACGCACATTGCGCCCCCTGGTATTCC GGGGGGCATGCCTGTCCGAGCGTCATTGCTGCCCTCAAGCACGGCTTGTGTGTTGGGCCC CCGTCCCCCTCTCCCGGGGGACGGGCCCGAAAG…	570	5′-TCC GTA GGT GAA CCT GCG G- 3′	5′-TCC TCC GCT TAT TGA TAT G-3′	Aspergillus fumigatus strain Zbf-R10 internal transcribed spacer 1, partial sequence; 5.8S ribosomal RNA gene and internal transcribed spacer 2, complete sequence; and 28S ribosomal RNA gene, partial sequence	1026	1026	0.98	0	1	KX064986.1	confirmed- 100 all same
H3	2	honeycup	Candida parapsilosis	3A E H3 N	GTGCTTACTGCATTTTTTCTTACACATGTGTTTTTCTCTTTTTGAAAACTTTGCTTTGGT AGGCCTTCTATATGGGGCCTGCCAGAGATTAAACTCAACCAAATTTTATTTAATGTCAAC CGATTATTTAATAGTCAAAACTTTCAACAACGGATCTCTTGGTTCTCGCATCGATGAAGA ACGCAGCGAAATGCGATAAGTAATATGAATTGCAGATATTCGTGAATCATCGAATCTTTG AACGCACATTGCGCCCTTTGGTATTCCAAAGGGCATGCCTGTTTGAGCGTCATTTCTCCC TCAAACCCTCGGGTTTGGTGTTGAGCGATACGCTGGGTTTGCTTGAAAGAAAGGCGGAGT ATAAACTAATGGATAGGTTTTTTCCACTCATTG…	892	5′-TCC GTA GGT GAA CCT GCG G- 3′	5′-TCC TCC GCT TAT TGA TAT G-3′	Candida parapsilosis strain B118B internal transcribed spacer 1, partial sequence; 5.8S ribosomal RNA gene and internal transcribed spacer 2, complete sequence; and 28S ribosomal RNA gene, partial sequence	880	1119	0.74	0	0.9959	KP674489.1	confirmed- 100 all same
H15	2	honeycup	Penicillium crustosum	3A J1 H15 A	GGGTCACCTCCCACCCGTGTTTATTTTACCTTGTTGCTTCGGCGGGCCCGCCTTAACTGG CCGCCGGGGGGCTTACGCCCCCGGGCCCGCGCCCGCCGAAGACACCCTCGAACTCTGTCT GAAGATTGAAGTCTGAGTGAAAATATAAATTATTTAAAACTTTCAACAACGGATCTCTTG GTTCCGGCATCGATGAAGAACGCAGCGAAATGCGATACGTAATGTGAATTGCAAATTCAG TGAATCATCGAGTCTTTGAACGCACATTGCGCCCCCTGGTATTCCGGGGGGCATGCCTGT CCGAGCGTCATTGCTGCCCTCAAGCCCGGCTTGTGTGTTGGGCCCCGTCCCCCGATCTCC GGGGGACGGGCCCGAAAGGCAGCGGCGGCACCG…	546	5′-TCC GTA GGT GAA CCT GCG G- 3′	5′-TCC TCC GCT TAT TGA TAT G-3′	Penicillium crustosum voucher Pen c10 internal transcribed spacer 1, partial sequence; 5.8S ribosomal RNA gene and internal transcribed spacer 2, complete sequence; and large subunit ribosomal RNA gene, partial sequence	994	994	1	0	1	MT298917.1	confirmed - 100 all same
H5	2	honeycup	Zygosaccharomyces rouxii	3B I H5 N	ACTCTTACGGAGTTCTCTCAAGTGTTGGAGGGGAAGGCCTGCGCTTAATTGCGCGGCTGT TTTTAATCTCCTCCGCCTTTGATACACACATTGGAGTTTCTACTTTTTTGTTCTCTTTGG GAGGGTTCTGCTCTCCCAGAGGTAAACACAAACAATCTTTTATTATACTATTAACACAGT CAAATGAATTTTAAAAACAAAATATTCAAAACTTTCAACAACGGATCTCTTGGTTCTCGC ATCGATGAAGAACGCAGCGAACTGCGATACGTAATGTGAATTGCAGAATTCCGTGAATCA TCGAATCTTTGAACGCACATTGCGCCCCTTGGTATTCCGGGGGGCATGCCTGTTTGAGCG TCATTTCCCTCTCAAACTTTACGTTTGGTAGTG…	603	5′-TCC GTA GGT GAA CCT GCG G- 3′	5′-TCC TCC GCT TAT TGA TAT G-3′	Zygosaccharomyces rouxii strain LL12_088 internal transcribed spacer 1, partial sequence; 5.8S ribosomal RNA gene and internal transcribed spacer 2, complete sequence; and 28S ribosomal RNA gene, partial sequence	1074	1074	1	0	0.9933	KF057681.1	confirmed - 100 all same
H2	2	honeycup	Aspergillus fumigatus	4 B H2 N	GTTTCGACGGCCGCCGGGGAGGCCTTGCGCCCCCGGGCCCGCGCCCGCCGAAGACCCCAA CATGAACGCTGTTCTGAAAGTATGCAGTCTGAGTTGATTATCGTAATCAGTTAAAACTTT CAACAACGGATCTCTTGGTTCCGGCATCGATGAAGAACGCAGCGAAATGCGATAAGTAAT GTGAATTGCAGAATTCAGTGAATCATCGAGTCTTTGAACGCACATTGCGCCCCCTGGTAT TCCGGGGGGCATGCCTGTCCGAGCGTCATTGCTGCCCTCAAGCACGGCTTGTGTGTTGGG CCCCCGTCCCCCTCTCCCGGGGGACGGGCCCGAAAGGCAGCGGCGGCACCGCGTCCGGTC CTCGAGCGTATGGGGCTTTGTCACCTGCTCTGT…	506	5′-TCC GTA GGT GAA CCT GCG G- 3′	5′-TCC TCC GCT TAT TGA TAT G-3′	Aspergillus fumigatus voucher MHE 24 MC internal transcribed spacer 1, partial sequence; 5.8S ribosomal RNA gene and internal transcribed spacer 2, complete sequence; and large subunit ribosomal RNA gene, partial sequence	920	920	1	0	1	KY617052.1	confirmed - 100 all same
K	2	honeycup	Monascus ruber	4 T1 K A	CATACCAAATCGGTTAAA ACTTTCAACAACGGATCTCTTGGTTCCGGCATCGATGAAGAACGCAGCGAAATGCGATAAGTAATGTGAA TTGCAGAATTCAGTGAATCATCGAATCTTTGAACGCACATTGCGCCCCCTGGTATTCCGGGGGGCATGCC TGTCCGAGCGTCATTACTGCCCCTCAAGCGCGGCTTGTGTGTTGGGCCGCCGTCCCCTGCGCCTCCGGGC AAGGGGGACGGGCCCGAAAGGCAGTGGCGGCGCCGCGTCCGGTCCTCGAGCGTATGGGGCTTTGTCACCC GCTCAGTAGGTCGGGCCGGGGCCTTTGCCCTCTCCAACCTTTTTTTCCTTAGGTTGACCT	363	5′-TCC GTA GGT GAA CCT GCG G- 3′	5′-TCC TCC GCT TAT TGA TAT G-3′	Monascus sp. (in: Fungi) strain CGMCC 3.568 small subunit ribosomal RNA gene, partial sequence; internal transcribed spacer 1, 5.8S ribosomal RNA gene, and internal transcribed spacer 2, complete sequence; and large subunit ribosomal RNA gene, partial sequence	628	628	1	3e-176	1	MN156543.1	unconfirmed - could be any number of monascus species (purpereus, pilosus, barkeri, fulinginosus, fumeus)
H10	3	larvaewax	Aspergillus flavus	2 X H10 A	GTTCTAGCGAGCCCACCTCCCACCCGTGTTTACTGTAACCTTAGTTGCTTCGGCGGGCCC GCCTTTAAGGCCGCCGGGGGGCATCAGCCCCCGGGCCCGCGCCCGCCGGAGACACCACGA ACTCTGTCTGATCTAGTGAAGTCTGAGTTGATTGTATCGCAATCAGTTAAAACTTTCAAC AATGGATCTCTTGGTTCCGGCATCGATGAAGAACGCAGCGAAATGCGATAACTAGTGTGA ATTGCAGAATTCCGTGAATCATCGAGTCTTTGAACGCACATTGCGCCCCCTGGTATTCCG GGGGGCATGCCTGTCCGAGCGTCATTGCTGCCCATCAAGCACGGCTTGTGTGTTGGGTCG TCGTCCCCTCTTCGGGGGGGACGGGCCCCAAAG…	625	5′-TCC GTA GGT GAA CCT GCG G- 3′	5′-TCC TCC GCT TAT TGA TAT G-3′	Aspergillus flavus strain AKF-9 internal transcribed spacer 1, partial sequence; 5.8S ribosomal RNA gene and internal transcribed spacer 2, complete sequence; and large subunit ribosomal RNA gene, partial sequence	1059	1178	0.99	0	0.9835	KX463458.1	unconfirmed - could be any aspergillus
H2	3	larvaewax	Aspergillus puniceus	3A O H2 N	CCCACAGGCAGGCCTAACCTCCCACCCGTGAATACCTGACCAACGTTGCTTCGGCGGTGC GCGCCCCCTTCCCGGGGGGCGTAAGCCGCCGGGGACCACACCGAACTTCTTGTTTTTAGC GTGTCGTCTGAGCTTGATACAAGCAAACCTAATTAAAACTTTCAACAATGGATCTCTTGG TTCCGGCATCGATGAAGAACGCAGCGAACTGCGATAAGTAATGTGAATTGCAGAATTCAG TGAATCATCGAGTCTTTGAACGCACATTGCGCCCCCTGGCATTCCGGGGGGCATGCCTGT CCGAGCGTCATTGCTGCCCTTCAAGCCCGGCTTGTGTGTTGGGTCGTCGTCCCCCCCGGG GGACGGGCCCGAAAGGCAGCGGCGGCACCGCGT…	579	5′-TCC GTA GGT GAA CCT GCG G- 3′	5′-TCC TCC GCT TAT TGA TAT G-3′	Aspergillus sp. BAB-4408 18S ribosomal RNA gene, partial sequence; internal transcribed spacer 1, 5.8S ribosomal RNA gene, and internal transcribed spacer 2, complete sequence; and 28S ribosomal RNA gene, partial sequence	1038	1452	0.99	0	0.9965	KR154899.1	unconfirmed - probably puniceus
H14	3	larvaewax	Monascus ruber	3B G1 H14 A	CATCGAATCTTTGAACGCACATTGCGCCCCCTGGTATTCCGGGGGGCATGCCTGTCCGAG CGTCATTACTGCCCCTCAAGCGCGGCTTGTGTGTTGGGCCGCCGTCCCCTGCGCCTCCGG GCAAGGGGGACGGGCCCGAAAGGCAGTGGCGGCGCCGCGTCCGGT	167	5′-TCC GTA GGT GAA CCT GCG G- 3′	5′-TCC TCC GCT TAT TGA TAT G-3′	Monascus sp. (in: Fungi) strain CGMCC 3.568 small subunit ribosomal RNA gene, partial sequence; internal transcribed spacer 1, 5.8S ribosomal RNA gene, and internal transcribed spacer 2, complete sequence; and large subunit ribosomal RNA gene, partial sequence	305	305	1	3e-79	1	MN156543.1	unconfirmed - could be any number of monascus species (purpereus, pilosus, barkeri, fulinginosus, fumeus)
H9	4	honey	Aspergillus tubingensis	2 U H9 N	TGGGCCACCTCCCATCCGTGTCTATTATACCCTGTTGCTTCGGCGGGCCCGCCGCTTGTC GGCCGCCGGGGGGGCGCCTTTGCCCCCCGGGCCCGTGCCCGCCGGAGACCCCAACACGAA CACTGTCTGAAAGCGTGCAGTCTGAGTTGATTGAATGCAATCAGTTAAAACTTTCAACAA TGGATCTCTTGGTTCCGGCATCGATGAAGAACGCAGCGAAATGCGATAACTAATGTGAAT TGCAGAATTCAGTGAATCATCGAGTCTTTGAACGCACATTGCGCCCCCTGGTATTCCGGG GGGCATGCCTGTCCGAGCGTCATTGCTGCCCTCAAGCCCGGCTTGTGTGTTGGGTCGCCG TCCCCCTCTCCGGGGGGACGGGCCCGAAAGGCA…	595	5′-TCC GTA GGT GAA CCT GCG G- 3′	5′-TCC TCC GCT TAT TGA TAT G-3′	Aspergillus tubingensis strain Cs/9/7 internal transcribed spacer 1, partial sequence; 5.8S ribosomal RNA gene and internal transcribed spacer 2, complete sequence; and 28S ribosomal RNA gene, partial sequence	1072	1072	1	0	0.9966	JN585944.1	unconfirmed - could be any aspergillus
