# Supplementary material for: Identification of fungi isolated from commercial bumblebee colonies
Source: PeerJ. 2024 Jan 30;12:e16713. doi: 10.7717/peerj.16713 (PMC10836204; doi:10.7717/peerj.16713)
Supplement: Table S2 — Raw data on the presence of growth from the various substrates over time. [file peerj-12-16713-s002.xlsx]

## Sheet: README
Inlcudes:	data on hives, tissue, and fungus grown in 2012 from commercial bumblebee colonies
hive.id	the ID of the hive from which the fungus was grown
tissue.type	the tissue type that the fungus was grown from	Tissue type: F= frass, HCW = honey cell wax, LCW = larvae cell wax, H = honey
tissue.area	area of the tissue material (in cm^2)
total.data.area	area within the boundaries of the Petri dish and standardised circle parameter
actual.data.area	total data area - tissue area
The remaining lines are the daily growth of from each tissue

## Sheet: datalog
hive.id	tissue.type	tissue.area	total.data.area	actual.data.area	d0.total.mass.area	d0.actual.daily.growth	d0.pg	d1.total.mass.area	d1.actual.daily.growth	d1.pg	d2.total.mass.area	d2.actual.daily.growth	d2.pg	d3.total.mass.area	d3.actual.daily.growth	d3.pg	d4.total.mass.area	d4.actual.daily.growth	d4.pg	d5.total.mass.area	d5.actual.daily.growth	d5.pg	d6.total.mass.area	d6.actual.daily.growth	d6.pg
H1	F	0.408	7.532	7.124	0.408	0	0	0.408	0	0	0.464	0.056	0.008	0.545	0.081	0.019	0.598	0.053	0.027	0.655	0.058	0.035	0.731	0.076	0.045
H1	HCW	0.173	7.465	7.292	0.173	0	0	0.55	0.377	0.052	0.684	0.134	0.07	1.119	0.435	0.13	1.5	0.381	0.182	1.959	0.459	0.245	2.178	0.218	0.275
H1	LCW	0.351	8.075	7.724	0.351	0	0	0.351	0	0	0.54	0.189	0.024	0.737	0.197	0.05	0.845	0.108	0.064	1.398	0.554	0.136	1.891	0.493	0.199
H1	H	0.655	8.075	7.42	0.655	0	0	1.034	0.379	0.051	1.233	0.199	0.078	1.644	0.411	0.133	1.925	0.281	0.171	2.418	0.493	0.238	2.702	0.284	0.276
H2	F	0.298	5.029	4.731	0.298	0	0	0.298	0	0	0.298	0	0	0.298	0	0	0.298	0	0	0.298	0	0	0.298	0	0
H2	HCW	0.257	6.194	5.937	0.257	0	0	0.257	0	0	0.257	0	0	0.257	0	0	0.257	0	0	0.381	0.124	0.021	0.405	0.024	0.025
H2	LCW	0.403	5.186	4.783	0.403	0	0	0.444	0.041	0.009	0.478	0.034	0.016	0.566	0.088	0.034	0.724	0.158	0.067	0.845	0.121	0.092	0.949	0.104	0.114
H2	H	0	8.152	8.152	0	0	0	0	0	0	0	0	0	0.087	0.087	0.011	0.476	0.389	0.058	0.508	0.032	0.062	0.649	0.141	0.08
H3	F	0.439	5.888	5.449	0.439	0	0	0.439	0	0	0.439	0	0	0.439	0	0	0.439	0	0	0.439	0	0	0.439	0	0
H3	HCW	0.509	8.231	7.722	0.509	0	0	0.509	0	0	0.509	0	0	0.561	0.052	0.007	0.674	0.113	0.021	3.346	1.393	0.367	7.547	4.201	0.911
H3	LCW	0.548	8.414	7.866	0.548	0	0	0.548	0	0	0.584	0.036	0.005	1.16	0.576	0.078	1.867	0.707	0.168	2.832	0.836	0.29	6.344	3.512	0.737
H3	H	0	8.343	8.343	0	0	0	0	0	0	0	0	0	0	0	0	0	0	0	0	0	0	0	0	0
H5	F	0.711	6.084	5.373	0.711	0	0	0.711	0	0	0.711	0	0	0.711	0	0	0.711	0	0	0.711	0	0	0.711	0	0
H5	HCW	1.08	7.913	6.833	1.08	0	0	1.418	0.338	0.049	1.498	0.08	0.061	2.095	0.597	0.149	4.788	2.693	0.543	7.147	2.359	0.888	7.913	0.766	1
H5	LCW	0.28	7.913	7.633	0.28	0	0	0.28	0	0	0.28	0	0	0.913	0.633	0.083	1.023	0.11	0.097	1.182	0.159	0.118	1.499	0.317	0.16
H5	H	0	7.913	7.913	0	0	0	0	0	0	0	0	0	0	0	0	0	0	0	0	0	0	0	0	0
H6	F	1.2	6.924	5.724	1.2	0	0	1.2	0	0	1.2	0	0	1.2	0	0	1.2	0	0	1.2	0	0	1.2	0	0
H6	HCW	0.53	7.065	6.535	0.53	0	0	0.53	0	0	0.53	0	0	4.898	4.368	0.668	7.065	2.167	1	7.065	0	1	7.065	0	1
H6	LCW	0.488	8.272	7.784	0.488	0	0	0.488	0	0	2.314	1.826	0.235	8.194	5.88	0.99	8.272	0.078	1	8.272	0	1	8.272	0	1
H6	H	0.652	8.272	7.62	0.652	0	0	1.229	0.577	0.076	1.576	0.347	0.121	1.7	0.124	0.138	1.947	0.247	0.17	2.085	0.138	0.188	2.18	0.095	0.201
H7	F	0.893	7.588	6.695	0.893	0	0	0.893	0	0	0.893	0	0	0.893	0	0	0.893	0	0	0.893	0	0	0.903	0.01	0.001
H7	HCW	0.439	7.423	6.984	0.439	0	0	0.655	0.216	0.031	0.655	0	0.031	0.655	0	0.031	0.655	0	0.031	0.655	0	0.031	0.655	0	0.031
H7	LCW	0.651	7.923	7.272	0.651	0	0	0.651	0	0	0.877	0.226	0.031	1.267	0.39	0.085	1.803	0.536	0.158	1.883	0.08	0.169	2.339	0.456	0.232
H7	H	0	7.923	7.923	0	0	0	0	0	0	0	0	0	0.317	0.317	0.04	0.409	0.092	0.052	0.834	0.425	0.105	1.694	0.86	0.214
H8	F	0.515	7.359	6.844	0.515	0	0	0.515	0	0	0.515	0	0	0.515	0	0	0.515	0	0	0.515	0	0	0.515	0	0
H8	HCW	0.676	7.94	7.264	0.676	0	0	0.676	0	0	0.676	0	0	0.676	0	0	0.676	0	0	0.676	0	0	0.676	0	0
H8	LCW	0.153	7.94	7.787	0.153	0	0	0.153	0	0	0.153	0	0	0.153	0	0	0.153	0	0	0.153	0	0	0.153	0	0
H8	H	0	7.94	7.94	0	0	0	1.169	1.169	0.147	1.578	0.409	0.199	2.2	0.622	0.277	2.311	0.111	0.291	2.752	0.441	0.347	3.015	0.263	0.38
H9	F	0.685	7.636	6.951	0.685	0	0	0.685	0	0	0.685	0	0	0.685	0	0	0.685	0	0	0.685	0	0	0.685	0	0
H9	HCW	0.6	7.916	7.316	0.6	0	0	0.6	0	0	0.682	0.082	0.011	0.773	0.091	0.024	0.826	0.053	0.031	0.831	0.005	0.032	0.831	0	0.032
H9	LCW	0.516	8.281	7.765	0.516	0	0	0.516	0	0	0.516	0	0	0.516	0	0	0.516	0	0	0.516	0	0	0.516	0	0
H9	H	0	8.281	8.281	0	0	0	0.18	0.18	0.022	1.319	1.139	0.159	3.435	2.116	0.415	4.176	0.741	0.504	4.784	0.608	0.578	5.955	1.171	0.719
H10	F	1.177	6.168	4.991	1.177	0	0	1.177	0	0	1.177	0	0	1.177	0	0	1.177	0	0	1.177	0	0	1.177	0	0
H10	HCW	0.822	6.448	5.626	0.822	0	0	0.822	0	0	0.822	0	0	0.822	0	0	0.822	0	0	0.822	0	0	0.822	0	0
H10	LCW	0.123	8.135	8.012	0.123	0	0	0.123	0	0	0.123	0	0	0.743	0.62	0.077	1.066	0.323	0.118	1.761	0.695	0.204	6.934	5.173	0.85
H10	H	0	8.135	8.135	0	0	0	0	0	0	1.284	1.284	0.158	1.467	0.183	0.18	1.67	0.203	0.205	1.723	0.053	0.212	2.487	0.764	0.306
H12	F	0.671	6.877	6.206	0.671	0	0	0.671	0	0	1.477	0.806	0.13	3.942	2.465	0.527	5.761	1.819	0.82	6.794	1.033	0.987	6.877	0.083	1
H12	HCW	1.096	8.233	7.137	1.096	0	0	1.096	0	0	1.096	0	0	1.096	0	0	1.096	0	0	1.096	0	0	3.467	2.371	0.332
H12	LCW	0.628	8.233	7.605	0.628	0	0	0.628	0	0	0.628	0	0	0.628	0	0	0.628	0	0	0.638	0.01	0.001	0.645	0.007	0.002
H12	H	0	8.233	8.233	0	0	0	0	0	0	1.919	1.919	0.233	2.716	0.797	0.33	2.517	-0.199	0.306	2.696	0.179	0.327	3.12	0.424	0.379
H14	F	0.523	5.678	5.155	0.523	0	0	0.523	0	0	0.523	0	0	0.523	0	0	0.523	0	0	0.523	0	0	0.523	0	0
H14	HCW	1.374	8.307	6.933	1.374	0	0	1.509	0.135	0.019	2.7	1.191	0.191	5.837	3.137	0.644	6.366	0.529	0.72	8.307	1.941	1	8.307	0	1
H14	LCW	0.626	8.307	7.681	0.626	0	0	1.036	0.41	0.053	1.892	0.856	0.165	1.951	0.059	0.173	1.999	0.048	0.179	2.998	0.999	0.309	3.998	1	0.439
H14	H	2.063	8.307	6.244	2.063	0	0	2.367	0.304	0.049	2.367	0	0.049	2.367	0	0.049	2.367	0	0.049	2.367	0	0.049	2.367	0	0.049
H15	F	0	5.919	5.919	0	0	0	0	0	0	0	0	0	0	0	0	0	0	0	0	0	0	0	0	0
H15	HCW	0	7.753	7.753	0	0	0	0	0	0	0	0	0	0	0	0	0	0	0	0	0	0	0	0	0
H15	LCW	0.722	7.73	7.008	0.722	0	0	0.722	0	0	0.722	0	0	0.722	0	0	0.722	0	0	0.722	0	0	0.722	0	0
H15	H	0	7.336	7.336	0	0	0	0	0	0	0.498	0.498	0.068	1.117	0.619	0.152	1.978	0.861	0.27	3.311	1.333	0.451	4.66	1.349	0.635
H16	F	0.718	6.349	5.631	0.718	0	0	0.824	0.106	0.019	0.966	0.142	0.044	1.111	0.145	0.07	1.111	0	0.07	1.111	0	0.07	1.111	0	0.07
H16	HCW	0.477	5.32	4.843	0.477	0	0	0.477	0	0	1.561	1.084	0.224	3.971	2.41	0.721	5.32	1.349	1	5.32	0	1	5.32	0	1
H16	LCW	0	6.112	6.112	0	0	0	0	0	0	0.062	0.062	0.01	0.062	0	0.01	0.062	0	0.01	0.062	0	0.01	0.062	0	0.01
H16	H	0	7.826	7.826	0	0	0	0	0	0	0	0	0	0.48	0.48	0.061	0.86	0.38	0.11	0.86	0	0.11	0.86	0	0.11
H17	F	2.007	6.741	4.734	2.007	0	0	2.007	0	0	2.007	0	0	2.007	0	0	2.007	0	0	2.007	0	0	3.175	1.168	0.247
H17	HCW	0.577	7.124	6.547	0.577	0	0	0.577	0	0	0.577	0	0	0.577	0	0	0.577	0	0	0.577	0	0	0.577	0	0
H17	LCW	0	7.844	7.844	0	0	0	0	0	0	0	0	0	0	0	0	0	0	0	0	0	0	0	0	0
H17	H	0	7.883	7.883	0	0	0	0	0	0	0	0	0	0	0	0	0.075	0.075	0.01	0.201	0.126	0.025	0.246	0.045	0.031
